# Supplementary material for: Association between Initial Opioid Prescription and Patient Pain with Continued Opioid Use among Opioid-Naïve Patients Undergoing Elective Surgery in a Large American Health System
Source: MDPI journal article supplement (doi:10.3390/ijerph20105766), 2023-05-09
Supplement: s1 [file s1]

## Supplementary Materials

**Table S1.** Characteristics of the cohorts that received 0 MME and MME  $\leq$  90.

| Characteristics                      | 0 MME         | 0 < MME $\leq$ 90 | <i>p</i> -value |
|--------------------------------------|---------------|-------------------|-----------------|
| Age, Mean (SD)                       | 54.41 (16.48) | 53.05 (16.84)     | <b>.002</b>     |
| Sex, N (%)                           |               |                   | <b>.006</b>     |
| Male                                 | 694 (34.0)    | 544 (38.6)        |                 |
| Female                               | 1349 (66.0)   | 865 (61.4)        |                 |
| Race/Ethnicity, N (%)                |               |                   | .202            |
| Hispanic                             | 96 (4.7)      | 62 (4.5)          |                 |
| Non-Hispanic White                   | 1641 (81.1)   | 1105 (79.7)       |                 |
| Non-Hispanic Black                   | 257 (12.7)    | 190 (13.7)        |                 |
| Other                                | 30 (1.5)      | 30 (2.2)          |                 |
| Elective Surgeries (CPT type), N (%) |               |                   | <b>&lt;.001</b> |
| Bariatric Surgery                    | 22 (1.1)      | 0 (0.0)           |                 |
| Carpal Tunnel Release                | 383 (18.7)    | 185 (13.1)        |                 |
| Colectomy                            | 39 (1.9)      | 54 (3.8)          |                 |
| Hemorrhoidectomy                     | 51 (2.5)      | 13 (0.9)          |                 |
| Hysterectomy                         | 363 (17.8)    | 108 (7.7)         |                 |
| Laparoscopic Appendectomy            | 79 (3.9)      | 73 (5.2)          |                 |
| Laparoscopic Cholecystectomy         | 452 (22.1)    | 348 (24.7)        |                 |
| Parathyroidectomy                    | 36 (1.8)      | 39 (2.8)          |                 |
| Reflux Surgery                       | 7 (0.3)       | 14 (1.0)          |                 |
| Thyroidectomy                        | 203 (9.9)     | 138 (9.8)         |                 |
| Transurethral Prostate Surgery       | 143 (7.0)     | 53 (3.8)          |                 |

|                            |             |             |       |
|----------------------------|-------------|-------------|-------|
| Ventral Hernia Repair      | 265 (13.0)  | 384 (27.3)  |       |
| Tobacco Smoking, N (%)     |             |             | .660  |
| Current Smoker             | 240 (11.7)  | 184 (13.1)  |       |
| Former Smoker              | 562 (27.5)  | 390 (27.7)  |       |
| Never Smoked               | 1237 (60.5) | 833 (59.1)  |       |
| Unknown                    | 4 (0.2)     | 2 (0.1)     |       |
| Tobacco Vaping, N (%)      |             |             | <.001 |
| Current User               | 32 (1.6)    | 40 (2.8)    |       |
| Former User                | 46 (2.3)    | 41 (2.9)    |       |
| Never Used                 | 1661 (81.3) | 1279 (90.8) |       |
| Unknown                    | 304 (14.9)  | 49 (3.5)    |       |
| Mental Disorder, N (%)     |             |             | .009  |
| Yes                        | 655 (32.1)  | 513 (36.4)  |       |
| No                         | 1388 (67.9) | 896 (63.6)  |       |
| Pre-operative Pain, N (%)  |             |             | <.001 |
| None/Mild                  | 1411 (69.1) | 1188 (84.3) |       |
| Moderate/Severe            | 400 (22.1)  | 187 (13.6)  |       |
| Post-operative Pain, N (%) |             |             | <.001 |
| None/Mild                  | 1353 (66.2) | 1164 (82.6) |       |
| Moderate/Severe            | 457 (25.2)  | 211 (15.3)  |       |
| Discharge Pain, N (%)      |             |             | .262  |
| None/Mild                  | 1501 (73.5) | 1060 (75.2) |       |
| Moderate/Severe            | 542 (26.5)  | 349 (24.8)  |       |

**Table S2.** Characteristics of the cohorts that received 0 MME and MME > 90.

| Characteristics                      | 0 MME         | MME >90       | <i>p</i> -value |
|--------------------------------------|---------------|---------------|-----------------|
| Age, Mean (SD)                       | 54.41 (16.48) | 50.30 (16.02) | <b>&lt;.001</b> |
| Sex, N (%)                           |               |               | .824            |
| Male                                 | 694 (34.0)    | 1956 (33.7)   |                 |
| Female                               | 1349 (66.0)   | 3854 (66.3)   |                 |
| Race/Ethnicity, N (%)                |               |               | <b>.026</b>     |
| Hispanic                             | 96 (4.7)      | 312 (5.4)     |                 |
| Non-Hispanic White                   | 1641 (81.1)   | 4493 (77.8)   |                 |
| Non-Hispanic Black                   | 257 (12.7)    | 868 (15.0)    |                 |
| Other                                | 30 (1.5)      | 99 (1.7)      |                 |
| Elective Surgeries (CPT type), N (%) |               |               | <b>&lt;.001</b> |
| Bariatric Surgery                    | 22 (1.1)      | 9 (0.2)       |                 |
| Carpal Tunnel Release                | 383 (18.7)    | 229 (3.9)     |                 |
| Colectomy                            | 39 (1.9)      | 475 (8.2)     |                 |
| Hemorrhoidectomy                     | 51 (2.5)      | 316 (5.4)     |                 |
| Hysterectomy                         | 363 (17.8)    | 945 (16.3)    |                 |
| Laparoscopic Appendectomy            | 79 (3.9)      | 409 (7.0)     |                 |
| Laparoscopic Cholecystectomy         | 452 (22.1)    | 1559 (26.8)   |                 |
| Parathyroidectomy                    | 36 (1.8)      | 255 (4.4)     |                 |
| Reflux Surgery                       | 7 (0.3)       | 30 (0.5)      |                 |
| Thyroidectomy                        | 203 (9.9)     | 454 (7.8)     |                 |
| Transurethral Prostate Surgery       | 143 (7.0)     | 123 (2.1)     |                 |
| Ventral Hernia Repair                | 265 (13.0)    | 1006 (17.3)   |                 |

|                            |             |             |                 |
|----------------------------|-------------|-------------|-----------------|
| Tobacco Smoking, N (%)     |             |             | <b>.002</b>     |
| Current Smoker             | 240 (11.7)  | 871 (15.0)  |                 |
| Former Smoker              | 562 (27.5)  | 1465 (25.2) |                 |
| Never Smoked               | 1237 (60.5) | 3456 (59.5) |                 |
| Unknown                    | 4 (0.2)     | 18 (0.3)    |                 |
| Tobacco Vaping, N (%)      |             |             | .132            |
| Current User               | 32 (1.6)    | 140 (2.4)   |                 |
| Former User                | 46 (2.3)    | 131 (2.3)   |                 |
| Never Used                 | 1661 (81.3) | 4721 (81.3) |                 |
| Unknown                    | 304 (14.9)  | 814 (14.0)  |                 |
| Mental Disorder, N (%)     |             |             | <b>.001</b>     |
| Yes                        | 655 (32.1)  | 2092 (36.0) |                 |
| No                         | 1388 (67.9) | 3718 (64.0) |                 |
| Pre-operative Pain, N (%)  |             |             | <b>&lt;.001</b> |
| None/Mild                  | 1411 (69.1) | 3948 (68.0) |                 |
| Moderate/Severe            | 400 (22.1)  | 1457 (27.0) |                 |
| Post-operative Pain, N (%) |             |             | <b>&lt;.001</b> |
| None/Mild                  | 1353 (66.2) | 3714 (63.9) |                 |
| Moderate/Severe            | 457 (25.2)  | 1665 (31.0) |                 |
| Discharge Pain, N (%)      |             |             | <b>&lt;.001</b> |
| None/Mild                  | 1501 (73.5) | 3785 (65.1) |                 |
| Moderate/Severe            | 542 (26.5)  | 2025 (34.9) |                 |

**Table S3.** Characteristics of the cohorts that received 0-90 MME and MME > 90.

| Characteristics                      | 0 < MME ≤ 90  | MME >90       | <i>p</i> -value |
|--------------------------------------|---------------|---------------|-----------------|
| Age, Mean (SD)                       | 53.05 (16.84) | 50.30 (16.02) | <.001           |
| Sex, N (%)                           |               |               | .001            |
| Male                                 | 544 (38.6)    | 1956 (33.7)   |                 |
| Female                               | 865 (61.4)    | 3854 (66.3)   |                 |
| Race/Ethnicity, N (%)                |               |               | .003            |
| Hispanic                             | 62 (4.5)      | 312 (5.4)     |                 |
| Non-Hispanic White                   | 1105 (79.7)   | 4493 (77.8)   |                 |
| Non-Hispanic Black                   | 190 (13.7)    | 868 (15.0)    |                 |
| Other                                | 30 (2.2)      | 99 (1.7)      |                 |
| Elective Surgeries (CPT type), N (%) |               |               | <.001           |
| Bariatric Surgery                    | 0 (0.0)       | 9 (0.2)       |                 |
| Carpal Tunnel Release                | 185 (13.1)    | 229 (3.9)     |                 |
| Colectomy                            | 54 (3.8)      | 475 (8.2)     |                 |
| Hemorrhoidectomy                     | 13 (0.9)      | 316 (5.4)     |                 |
| Hysterectomy                         | 108 (7.7)     | 945 (16.3)    |                 |
| Laparoscopic Appendectomy            | 73 (5.2)      | 409 (7.0)     |                 |
| Laparoscopic Cholecystectomy         | 348 (24.7)    | 1559 (26.8)   |                 |
| Parathyroidectomy                    | 39 (2.8)      | 255 (4.4)     |                 |
| Reflux Surgery                       | 14 (1.0)      | 30 (0.5)      |                 |
| Thyroidectomy                        | 138 (9.8)     | 454 (7.8)     |                 |
| Transurethral Prostate Surgery       | 53 (3.8)      | 123 (2.1)     |                 |
| Ventral Hernia Repair                | 384 (27.3)    | 1006 (17.3)   |                 |

|                                      |               |                 |       |
|--------------------------------------|---------------|-----------------|-------|
| Tobacco Smoking, N (%)               |               |                 | .078  |
| Current Smoker                       | 184 (13.1)    | 871 (15.0)      |       |
| Former Smoker                        | 390 (27.7)    | 1465 (25.2)     |       |
| Never Smoked                         | 833 (59.1)    | 3456 (59.5)     |       |
| Unknown                              | 2 (0.1)       | 18 (0.3)        |       |
| Tobacco Vaping, N (%)                |               |                 | <.001 |
| Current User                         | 40 (2.8)      | 140 (2.4)       |       |
| Former User                          | 41 (2.9)      | 131 (2.3)       |       |
| Never Used                           | 1279 (90.8)   | 4721 (81.3)     |       |
| Unknown                              | 49 (3.5)      | 814 (14.0)      |       |
| Mental Disorder, N (%)               |               |                 | .802  |
| Yes                                  | 513 (36.4)    | 2092 (36.0)     |       |
| No                                   | 896 (63.6)    | 3718 (64.0)     |       |
| Pre-operative Pain, N (%)            |               |                 | <.001 |
| None/Mild                            | 1188 (84.3)   | 3948 (68.0)     |       |
| Moderate/Severe                      | 187 (13.6)    | 1457 (27.0)     |       |
| Post-operative Pain, N (%)           |               |                 | <.001 |
| None/Mild                            | 1164 (82.6)   | 3714 (63.9)     |       |
| Moderate/Severe                      | 211 (15.3)    | 1665 (31.0)     |       |
| Discharge Pain, N (%)                |               |                 | <.001 |
| None/Mild                            | 1060 (75.2)   | 3785 (65.1)     |       |
| Moderate/Severe                      | 349 (24.8)    | 2025 (34.9)     |       |
| MME in first prescription, Mean (SD) | 61.67 (14.84) | 223.95 (152.56) | <.001 |
| Any Refill, N (%)                    |               |                 | <.001 |
| Yes                                  | 149 (10.6)    | 1059 (18.2)     |       |

---

|    |             |             |
|----|-------------|-------------|
| No | 1260 (89.4) | 4751 (81.8) |
|----|-------------|-------------|

---
